# Supplementary material
Source: PubMed Central journal article supplement (PMC3564007)
Supplement: NIHMS51409-supplement-Supporting_Information.pdf [file NIHMS51409-supplement-Supporting_Information.pdf]

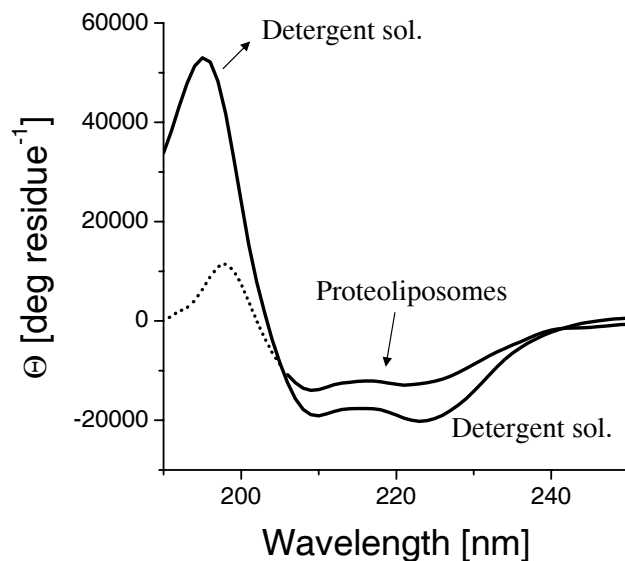

**Figure S1:** CD spectra of *cbo<sub>3</sub>* in detergent and after reconstitution (20° C, 5 mM phosphate buffer, pH 7.4).

## Supporting information

### Protein reconstitution and CD spectra

Circular dichroism (CD) spectroscopy has been used to confirm that cytochrome *bo<sub>3</sub>* (*cbo<sub>3</sub>*) retains its integrity during reconstitution in *E. coli* 'polar' lipid vesicles. Figure S1 shows the CD spectra of the detergent solubilised protein (in 0.05% DDM) and *cbo<sub>3</sub>* after reconstitution (proteoliposomes). The protein concentration of the CD samples was determined using Schaffer-Weissman protein assay. For the proteoliposomes it was not possible to obtain good spectra at < 205 nm, due to light scattering of the vesicles, resulting in a depression of the signal at these wavelengths. Diluting the sample further resulted in a poor signal-to-noise ratio. Analysis of the CD was performed, but in line with literature,<sup>1</sup> the results of both samples did not correspond with the secondary structure obtained from the crystallographic data.<sup>2</sup> Still, both CD spectra - with bands at 220, 210 and 195 nm - are characteristic for  $\alpha$ -helical proteins and confirm that *cbo<sub>3</sub>* is in its native form in the proteoliposomes.

### Analysis of the electrochemical impedance spectroscopic (EIS) data

The equivalent circuit for a tBLM can be described as  $R(R_m C_m)C_s$  in which the elements in brackets are parallel,  $R$  is the solution resistance ( $\sim 50 \Omega \text{ cm}^2$ ),  $R_m$  is the membrane resistance,  $C_m$  is the double layer capacitance of the membrane and  $C_s$  the double layer capacitance of the underlying surface. Data analysis indicated that this model was not able to accurately fit the data. Also when the capacitance elements were modeled using

Constant Phase Elements, often used to represent surface roughness, no adequate fit could be obtained (see Figure S2).

Instead, the data indicated that  $R_m$  and  $C_m$  exhibited a distribution of time-constants and best fits were obtained when modelling the dielectric relaxation of the membrane. This was done by equation (1) as described in ref.<sup>3,4</sup> which combines the empirical analytical expression of Havriliak and Negami (HN)<sup>5</sup> with a Constant Phase Element. The groups of Sackman and Wagner have shown that dielectric relaxation can be used to represent equivalent circuits containing multiple parallel RC elements and is useful when modeling supported lipid bilayer with lateral heterogeneities.<sup>6</sup>

$$Z = \frac{1}{(i\omega)^\beta \omega_0^{1-\beta} \left[ \frac{\Delta C}{1+(i\omega\tau)^\alpha} + C_{\text{inf}} \right]} \quad (1)$$

in which  $C_{\text{inf}}$  is the double capacitance of the membrane and  $\Delta C$  the addition low-frequency capacitive element with the relaxation time constant  $\tau$ .  $\omega$  is the impedance frequency and  $\alpha$  and  $\beta$  are variables that describe the relaxation and roughness of the surface (CPE element), respectively. As expected for the flat surfaces of the template stripped gold substrates,  $\beta$  is close to 1 (Table S1). Equation 1 does not only account for  $C_m$ , but also for its relaxation properties, thus replacing  $R_m$ . (Thus, the data is fitted with equation (1) in parallel with the solutions resistance only). The reason for this can be understood if one realises that  $C_{\text{inf}} + \Delta C$  is the capacitance observed at the low-frequency limit as  $C_s$  would have done in the above circuit description  $[R(R_m C_m) C_s]$ .  $C_s$  could not always be determined using frequencies  $> 0.1$  Hz and, for a similar reason,  $\Delta C$  remains unresolved when fitting certain data.. Analysis indicated that the parameters  $\tau$  and  $\Delta C$  were highly correlated. When  $\Delta C$  cannot be determined accurately by fitting the data, a value for  $\tau$  can therefore not be given. Instead, Figure S2 shows  $C_m$  [‘back’ calculated using equation (1)] as a function of  $\omega$  for the fits shown in Figure 2 of the article.

Figure S2 shows that at frequencies  $> 10^3 \text{ s}^{-1}$  the bilayer capacitance is roughly equal to  $C_{\text{inf}}$ . At frequencies  $< 10^3 \text{ s}^{-1}$ ,  $C_m$  increases indicating that in this time domain ions can either pass the lipid bilayer or the dielectric of lipid bilayer relaxes. Finally, it can be seen that, in line with the Bode plots,  $C_m$  increases more steeply for tBLMs with  $cbO_3$  than without, suggesting that the presence of  $cbO_3$  slightly increases the permeability of the membranes. This can be either due to small defects or proton transfer via the  $cbO_3$ .

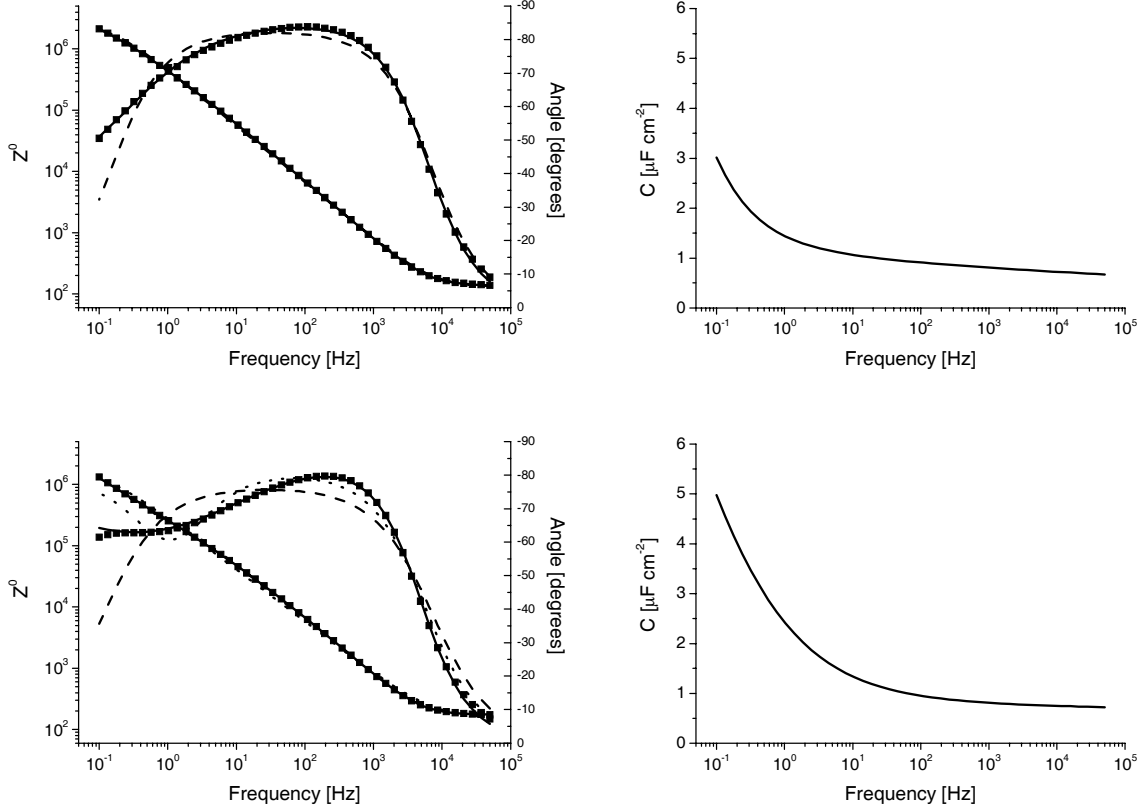

**Figure S2:** (Left) Bode Plots of the same data shown in Figure 2 of the article. The lines represent the best fits using the following equivalent circuits. (solid line)  $RC_m$ , in which  $C_m$  is modelled with eq. 1; (dashed line)  $R(R_m C_m)$ , in which  $C_m$  is modelled with a CPE; (dotted line)  $R(R_m C_m)C_s$ , in which  $C_m$  and  $C_s$  are modelled using CPEs. For the fits of the solid lines the fitted  $C_m$  as a function of frequency is given in the graphs on the right. (Top) Control vesicles (without *cbo3*); (Bottom) Proteoliposomes.

**Table S1: Parameters obtained when fitting the data shown in Figure S2.**

| Data                | Equivalent Circuit | Element                   | Parameter | Value                  |                     |
|---------------------|--------------------|---------------------------|-----------|------------------------|---------------------|
| Without <i>cbo3</i> | $R(R_m C_m)$       | $R_m$                     | R         | $0.7 M\Omega cm^{-2}$  |                     |
|                     |                    | $C_m$ (CPE <sup>a</sup> ) | $Q^0$     | $1.6 \mu F cm^{-2}$    |                     |
|                     |                    |                           | $\alpha$  | 0.92                   |                     |
|                     | $RC_m$             | $C_m$ (Eq. 1)             |           | $\Delta C$             | n.d.                |
|                     |                    |                           |           | $C_{inf}$              | $1.2 \mu F cm^{-2}$ |
|                     |                    |                           |           | $\tau$                 | n.d.                |
|                     |                    |                           |           | $\alpha$               | 0.60                |
|                     |                    |                           | $\beta$   | 0.95                   |                     |
| With <i>cbo3</i>    | $R(R_m C_m)$       | $R_m$                     | R         | $0.5 M\Omega cm^{-2}$  |                     |
|                     |                    | $C_m$ (CPE)               | $Q^0$     | $2.9 \mu F cm^{-2}$    |                     |
|                     |                    |                           | $\alpha$  | 0.85                   |                     |
|                     | $R(R_m C_m)C_s$    | $R_m$                     | R         | $0.03 M\Omega cm^{-2}$ |                     |
|                     |                    | $C_m$ (CPE)               | $Q^0$     | $3.3 \mu F cm^{-2}$    |                     |
|                     |                    |                           | $\alpha$  | 0.91                   |                     |
|                     |                    | $C_s$ (CPE)               | $Q^0$     | $4.5 \mu F cm^{-2}$    |                     |
|                     |                    |                           | $\alpha$  | 0.89                   |                     |
|                     | $RC_m$             | $C_m$ (Eq. 1)             |           | $\Delta C$             | $14 \mu F cm^{-2}$  |
|                     |                    |                           | $C_{inf}$ | $0.88 \mu F cm^{-2}$   |                     |
|                     |                    |                           | $\tau$    | $9 s^{-1}$             |                     |
|                     |                    |                           | $\alpha$  | 0.46                   |                     |
|                     |                    |                           | $\beta$   | 0.98                   |                     |

<sup>a</sup> Constant Phase Element using  $Z = 1/((i\omega)^\alpha Q^0)$

## References

1. Wallace, B. A.; Lees, J. G.; Orry, A. J. W.; Lobley, A.; Janes, R. W. *Protein Sci.* **2003**, *12*, 875-884.
2. Abramson, J.; Riistama, S.; Larsson, G.; Jasaitis, A.; Svensson-Ek, N.; Laakkonen, L.; Puustinen, A.; Iwata, S.; Wikström, M. *Nat. Struct. Biol.* **2000**, *7*, 910-917.
3. Whitehouse, C.; Gidalevitz, D.; Cahuzac, M.; Koeppe II, R. E.; Nelson, A. *Langmuir* **2004**, *20*, 9281-9298.
4. Whitehouse, C.; O'Flanagan, R.; Lindholm-Sethson, B.; Movaghar, B.; Nelson, A. *Langmuir* **2004**, *20*, 136-144.
5. Jonscher, A. K. *J. Phys. D.: Appl. Phys.* **1999**, *32*, R57-R70.
6. Wiegand, G.; Arribas-Layton, N.; Hillebrandt, H.; Sackmann, E.; Wagner, P. *J. Phys. Chem. B* **2002**, *106*, 4245-4254.
